# Supplementary material for: Lysosome passivation triggered by silver nanoparticles enhances subcellular-targeted drug therapy
Source: Royal Society of Chemistry journal article supplement (doi:10.1039/d4nr00451e), 2024-01-01
Supplement: d4nr00451e1.pdf [file d4nr00451e1.pdf]

Supplementary Materials

**Lysosome Passivation Triggered by Silver Nanoparticles Enhances Subcellular-Targeted Drug Therapy**

Xueqian Wang<sup>a,d</sup>, Shulin Zhao<sup>a,d</sup>, Guiqian Fang<sup>a,d</sup>, Ran Wang<sup>b,d</sup>, Xinxing Lyu<sup>d</sup>, Xintian Shao<sup>c,d</sup>, Peixue Ling<sup>b</sup>, CaiCai Meng<sup>\*c</sup>, Jia Chen<sup>\*d</sup>, Yanling Mu<sup>\*a</sup>

*a. School of Pharmaceutical Sciences & Institute of Materia Medica, National Key Laboratory of Advanced Drug Delivery System, Medical Science and Technology Innovation Center, Key Laboratory for Biotechnology Drugs of National Health Commission, Shandong First Medical University & Shandong Academy of Medical Sciences, Jinan, Shandong 250117, PR China*

*b. Shandong Academy of Pharmaceutical Science, Key Laboratory of Biopharmaceuticals, Engineering Laboratory of Polysaccharide Drugs, National-Local Joint Engineering Laboratory of Polysaccharide Drugs, Jinan 250101, PR China*

*c. School of Life Sciences, Medical Science and Technology Innovation Center, Shandong First Medical University & Shandong Academy of Medical Sciences, Jinan, Shandong 250117, PR China*

*d. Medical Science and Technology Innovation Center, Shandong First Medical University & Shandong Academy of Medical Sciences, Jinan, Shandong 250117, PR China*

---

\* Corresponding author.

E-mail address: muyanling@sdfmu.edu.cn

16

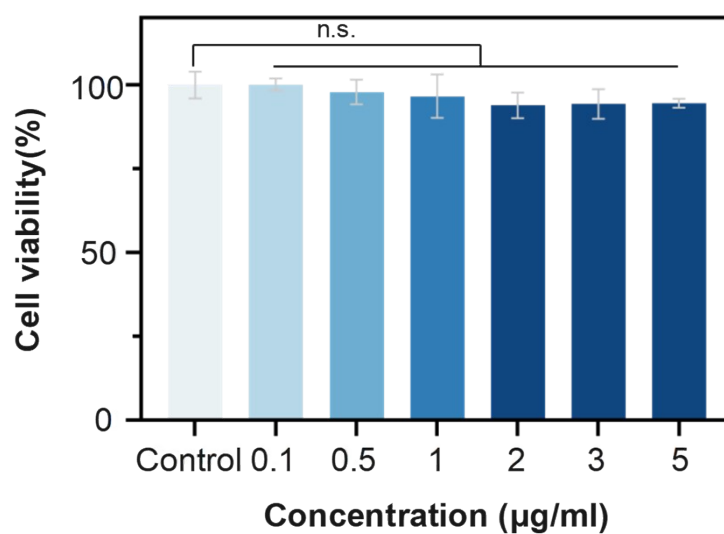

17

18 **Supplementary Figure 1.** HeLa cells viability treated with different concentration of  
19 Cy3.5@Ag NPs for 24 h via CCK-8 assay. Data are presented as mean  $\pm$  standard error  
20 of mean (SEM) (n.s. for no significant difference).

21

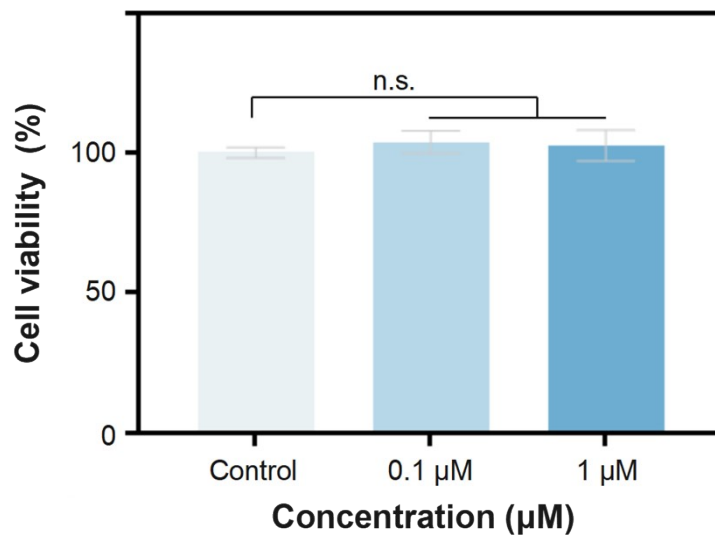

22

23 **Supplementary Figure 2.** Cell viability of Cy3.5 (0.1 μM, 1.0 μM) for 24 h via CCK-8  
24 assay. Data are presented as mean ± SEM (n.s. for no significant difference)

25

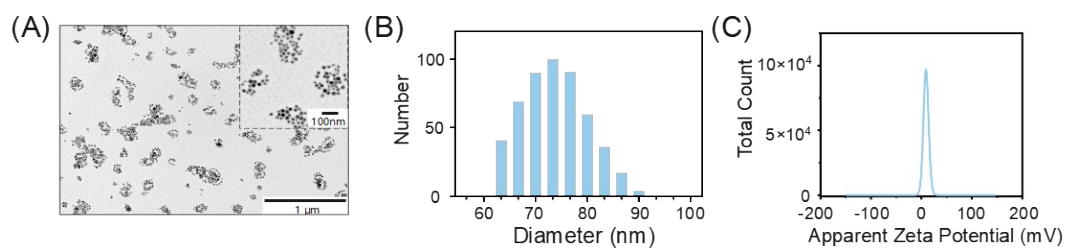

26  
 27 **Supplementary Figure 3.** Morphology characterization of Cy3.5@Ag NPs. (A) TEM  
 28 images of the Cy3.5@Ag NPs. (B) DLS results of Cy3.5@Ag NPs from 3 independent  
 29 experiments. (C) Zeta potential of Cy3.5@Ag NPs from 3 independent experiments.  
 30

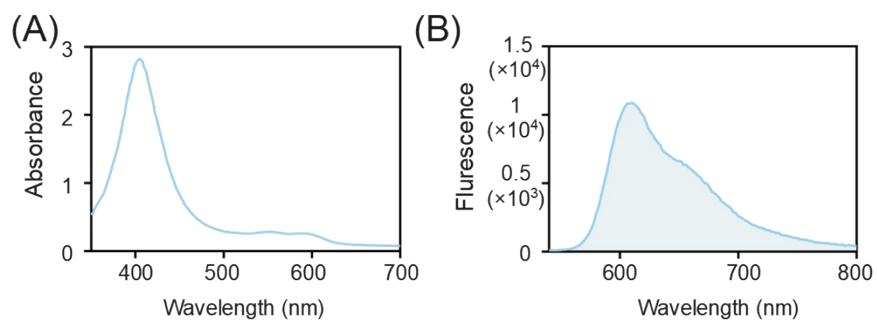

31  
 32 **Supplementary Figure 4.** Photophysical properties of Cy3.5@Ag NPs. (A)  
 33 Absorption spectrum of Cy3.5@Ag NPs (1 mg/mL). (B) Fluorescence of **Cy3.5@Ag**  
 34 **NPs** (1 mg/ml) solution,  $E_x=500$  nm,  $E_m=610$ nm.  
 35

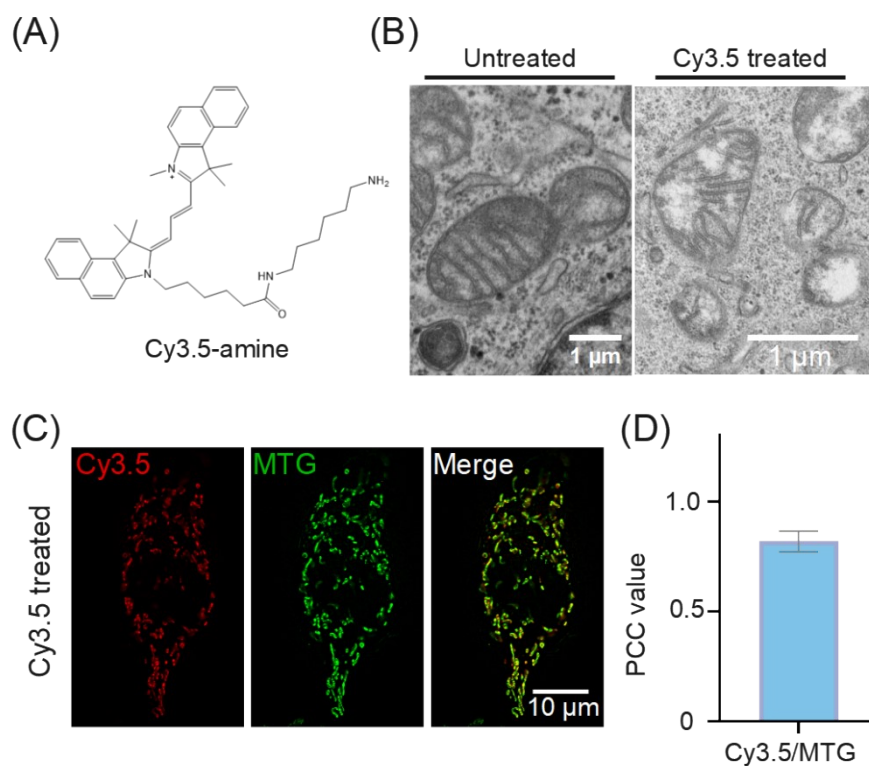

36  
 37 **Supplementary Figure 5.** The chemical structure and cell imaging of Cy3.5. (A) The  
 38 chemical structure of Cy3.5. (B) TEM images of mitochondria with Cy 3.5 (0.1  $\mu\text{M}$ , 6  
 39 h) treatment. (C) Colocalization images of HeLa cells stained by Cy 3.5 (0.1  $\mu\text{M}$ ,  $\lambda_{\text{ex}}$  =  
 40 561 nm,  $\lambda_{\text{em}}$  = 580–627 nm) for 1 h and MTG (100 nM,  $\lambda_{\text{ex}}$  = 488 nm,  $\lambda_{\text{em}}$  = 500–550  
 41 nm) for 30min. (D) PCC value of Cy3.5<sup>561-590</sup>/MTG<sup>488-525</sup>.  
 42

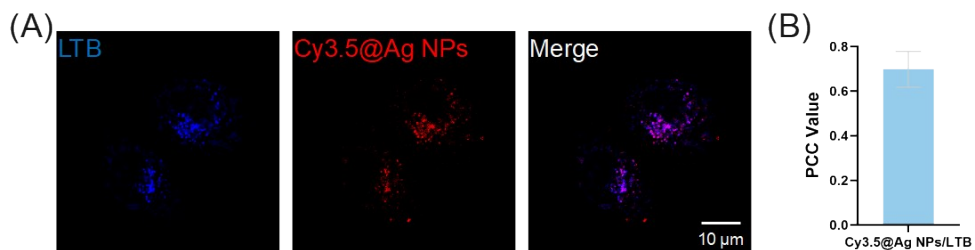

43

44 **Supplementary Figure 6.** Colocalization of Cy3.5@Ag NPs and LTB. (A) HeLa  
 45 cells co-stained with Cy3.5@Ag NPs (0.5 μg/ml, 1 h,  $\lambda_{\text{ex}} = 488$  nm,  $\lambda_{\text{em}} = 580$ -627  
 46 nm) and Lyso-Tracker Blue (LTB, 100 nM, 30 min,  $\lambda_{\text{ex}} = 405$  nm,  $\lambda_{\text{em}} = 417$ -476  
 47 nm). (B) PCC values of Cy3.5@Ag NPs<sup>488-590</sup>/ LTB<sup>405-488</sup>.

48

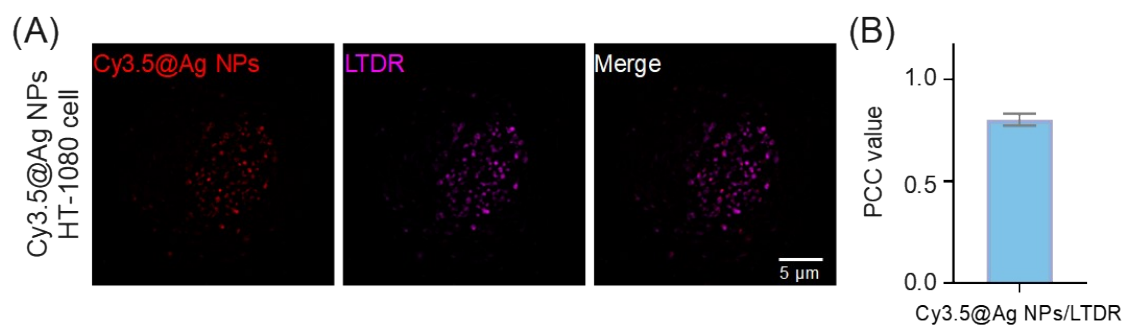

49

50 **Supplementary Figure 7.** (A) Representative images of HT-1080 cells co-stained with  
 51 Cy3.5@Ag NPs (0.5  $\mu$ g/ml, 1 h,  $\lambda_{\text{ex}}$  = 488 nm,  $\lambda_{\text{em}}$  = 580-627 nm) and LTDR (100 nM,  
 52 30min,  $\lambda_{\text{ex}}$  = 640 nm,  $\lambda_{\text{em}}$  = 655–705 nm). (B) PCC value of Cy3.5@Ag NPs<sup>488-</sup>  
 53 <sup>590</sup>/LTDR<sup>640-690</sup>

54

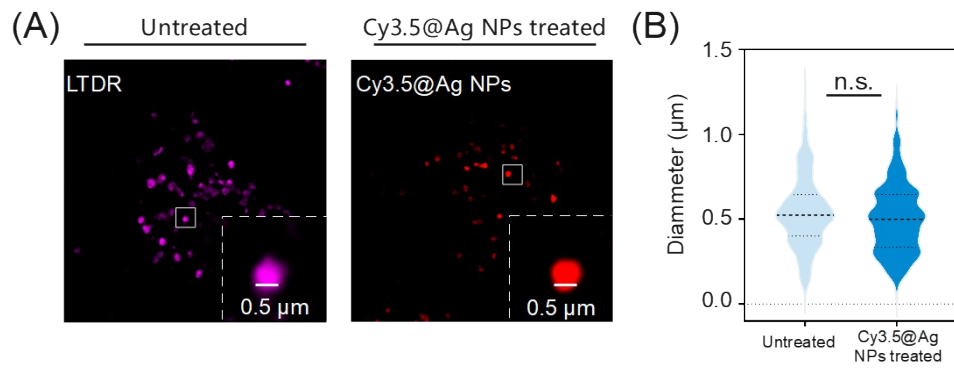

55

56 **Supplementary Figure 8.** (A) Fluorescence images of lysosome in HeLa cells  
 57 incubated with LTDR (100 nM,  $\lambda_{\text{ex}} = 640$  nm,  $\lambda_{\text{em}} = 655\text{--}705$  nm) and **Cy3.5@Ag NPs**  
 58 (0.5  $\mu\text{g/mL}$ ,  $\lambda_{\text{ex}} = 488$  nm,  $\lambda_{\text{em}} = 580\text{--}627$  nm). (B) The size distribution of lysosomes  
 59 in HeLa cells with or without **Cy3.5@Ag NPs** treatment. Data are presented as mean  $\pm$   
 60 SEM (n.s. for no significant difference).

61

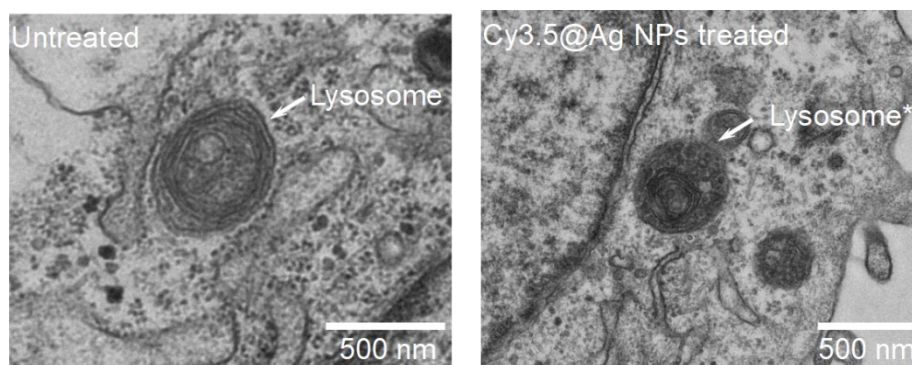

62  
 63 **Supplementary Figure 9.** Representative TEM images of lysosomes for HeLa cells  
 64 with or without Cy3.5@Ag NPs (0.5  $\mu\text{g/ml}$ , 1 h) treatment.  
 65

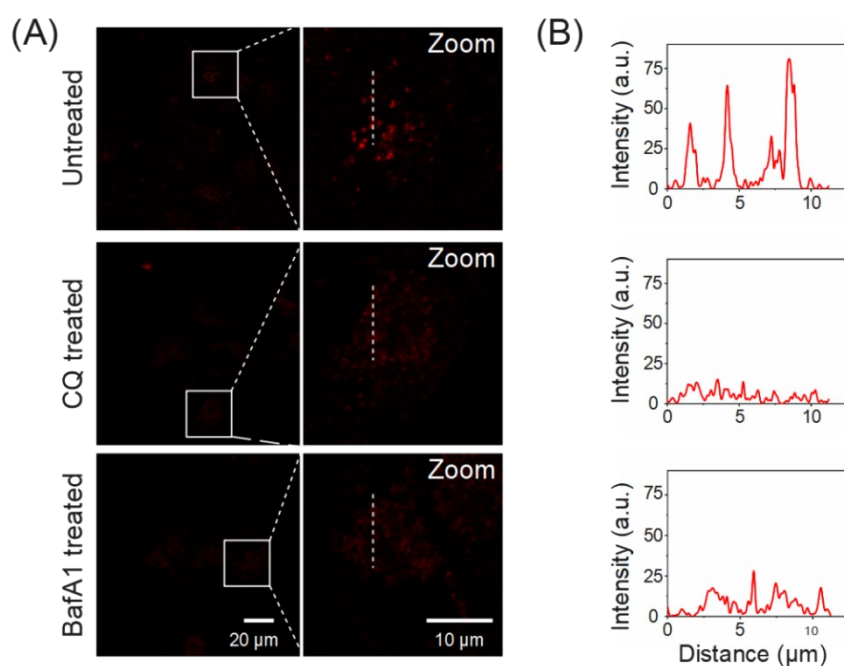

67

68 **Supplementary Figure 10.** Specific localization of Cy3.5@Ag NPs in lysosomes. (A)  
 69 Confocal images of HeLa cells treated with CQ (100 nM, 3 h) or BafA1 (50 mM, 3 h)  
 70 and Cy3.5@Ag NPs (0.5 µg/ml, 1 h,  $\lambda_{\text{ex}} = 488 \text{ nm}$ ,  $\lambda_{\text{em}} = 580\text{-}627 \text{ nm}$ ). Zoom-in images  
 71 of regions of interest are presented in white rectangles. (B) Fluorescence intensity of  
 72 Cy3.5@Ag NPs in white line from zoom images.

73

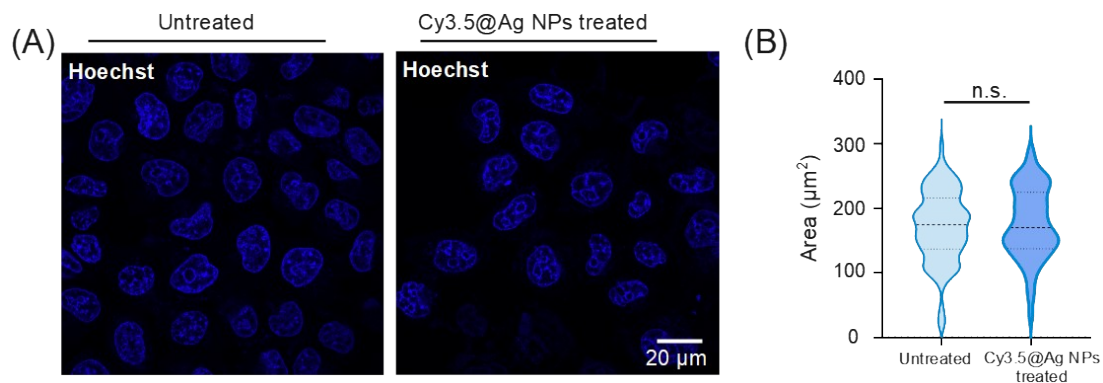

74

75 **Supplementary Figure 11.** Effect of Cy3.5@Ag NPs on the nucleus. (A) Confocal  
 76 imaging of Hoechst-labeled nucleus in HeLa cells with or without Cy3.5@Ag NPs (0.5  
 77  $\mu\text{g}/\text{ml}$ , 1 h) treatment. (B) The plot shows the fluorescence area of nucleus for HeLa  
 78 cells. Data are presented as mean  $\pm$  SEM ( $n=50$  cells for each group, n.s. for no  
 79 significant difference).

80

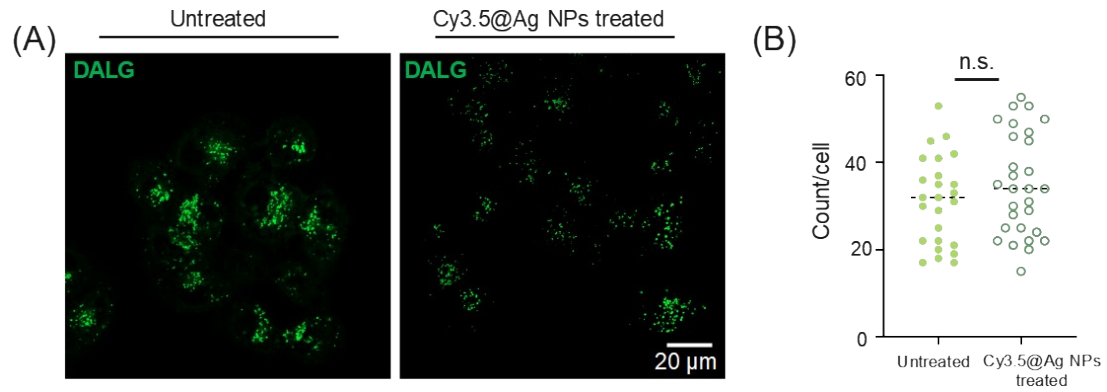

81  
 82 **Supplementary Figure 12.** Effect of Cy3.5@Ag NPs on autophagolysosome (ALs).  
 83 (A) Confocal imaging of DALG-labeled ALs in HeLa cells with or without Cy3.5@Ag  
 84 NPs (0.5  $\mu\text{g}/\text{ml}$ , 1 h) treatment. (B) The plot shows the count of autophagolysosome for  
 85 HeLa cells. Data are presented as mean  $\pm$  SEM ( $n=25$  for untreated cells,  $n=29$  for  
 86 Cy3.5@Ag NPs treated cells, n.s. for no significant difference).  
 87

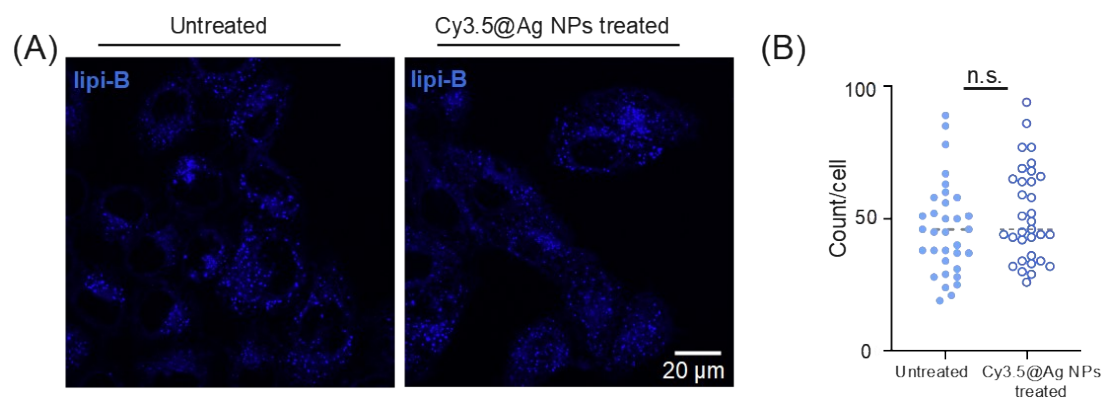

88  
 89 **Supplementary Figure 13.** Effect of Cy3.5@Ag NPs on lipid droplets (LDs). (A)  
 90 Confocal imaging of Lipi-Blue-labeled LDS in HeLa cells with or without Cy3.5@Ag  
 91 NPs (0.5  $\mu\text{g/ml}$ , 1 h) treatment. (B) The plot shows the count of LDS for HeLa cells.  
 92 Data are presented as mean  $\pm$  SEM ( $n=33$  cells, n.s. for no significant difference).  
 93

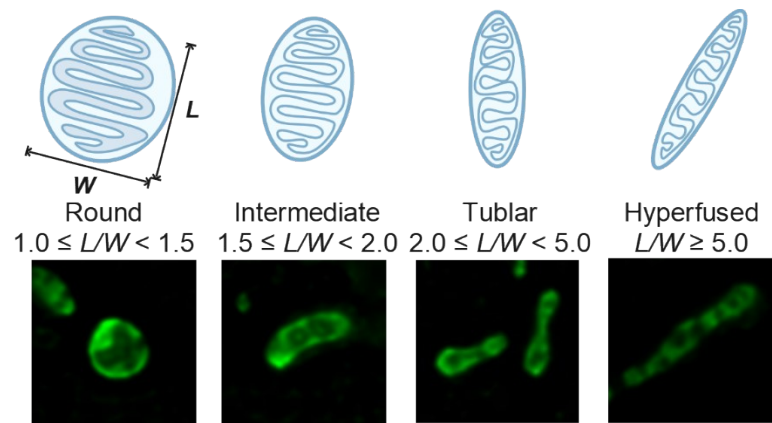

94

95 **Supplementary Figure 14.** Representative images of mitochondrial structure and  
 96 definition of  $L/W$  parameters for description of mitochondrial morphology description.

97

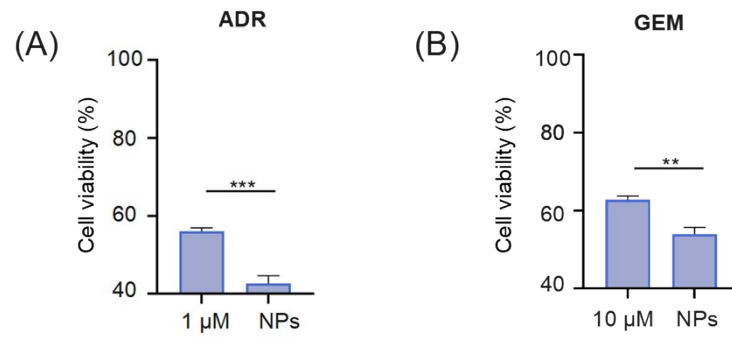

98

99 **Supplementary Figure 15.** Cytotoxicity assay of ADR (A) and GEM (B) for HeLa  
 100 cells with or without Cy3.5@Ag NPs treatment. Data are presented as mean  $\pm$  SEM.  $P$   
 101  $< 0.05$  is considered significant (\*\* $P < 0.01$ , \*\*\* $P < 0.001$ ).
